# Supplementary material for: The effect of Ganoderma lucidum extract on immunological function and identify its anti-tumor immunostimulatory activity based on the biological network
Source: PubMed Central journal article supplement (PMC6107651; doi:10.1038/s41598-018-30881-0), 2018-08-23

The effect of Ganoderma lucidum extract on immunological function and identify its anti-tumor immunostimulatory activity based on the biological network

Ruolin Zhao <sup>1,2</sup>, Qilong Chen <sup>1,2#</sup>, Yu-min He <sup>1#</sup>

<sup>1</sup> Shanghai University of Traditional Chinese Medicine, Shanghai 201203

<sup>2</sup> Research Center for TCM Complexity System, Shanghai University of TCM, Shanghai 201203, China

\* These authors are contributing for this paper.

# **Correspondence to:** Qilong Chen, email: [cqlw1975@126.com](mailto:cqlw1975@126.com), and Yu-min He, **email:** [heyumin109109@sina.com](mailto:heyumin109109@sina.com), Address: No.1200 Cailun Road, Shanghai, 201203, China.

Supplementary data 1: The 6 kernel mRNAs related encoding proteins were validated using Western-blot, which including GNAS, PTPN22, CD3G, PRKG2, MAP3K8 and NGFR. The  $\beta$ -actin was used as a loading control.

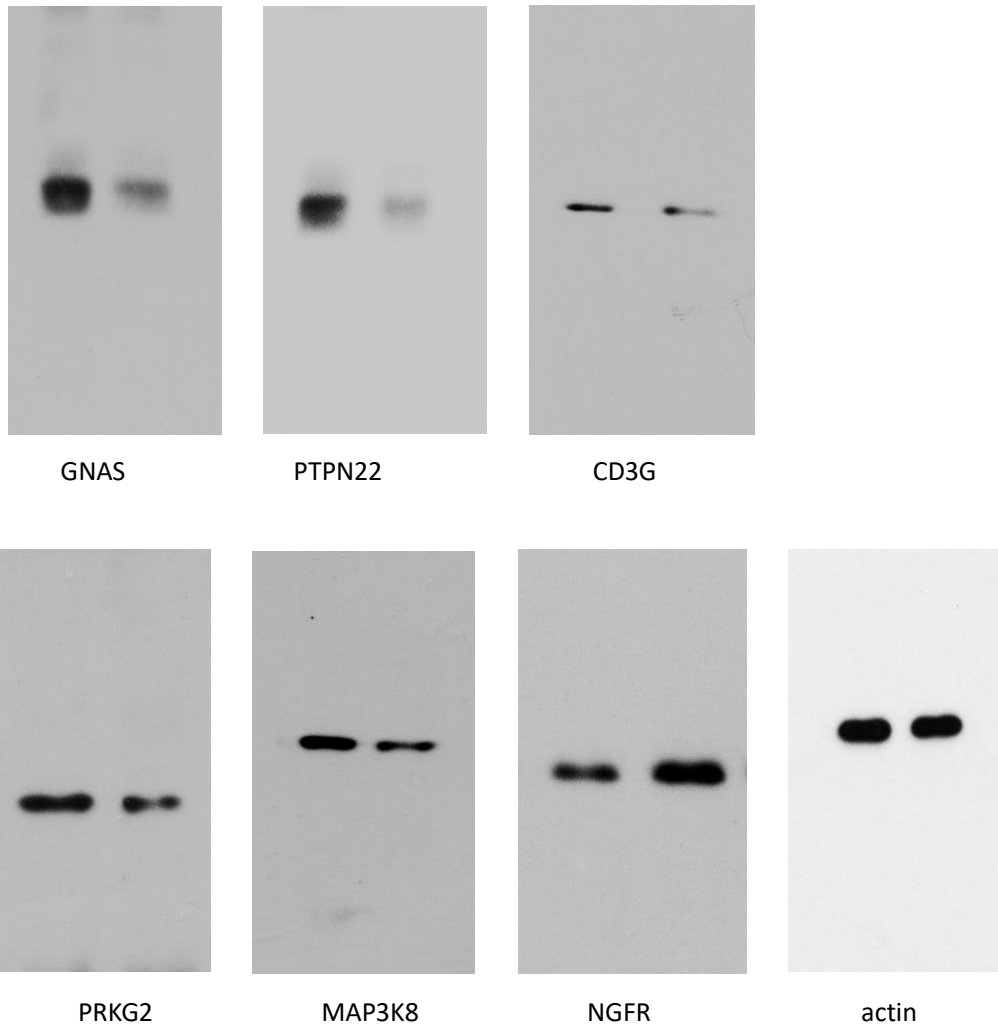

Supplementary data 2:

(A) The Jak/Stat signaling pathway related proteins were validated using Western-blot, and the expression levels of JAK3, p-Stat1, p-Stat3, p-Stat5 and p-Stat6 were significantly inhibited by GLE in vivo; (B) The T cell receptor signaling pathway related proteins were validated using Western-blot, and the expression levels of p-Lck and p-Zap-70 were down-regulated; (C) The PI3K/Akt/mTOR signaling pathway related proteins were validated using Western-blot, the expression levels of p-Akt and p-mTOR were down-regulated, and PI3K was up-regulated. The  $\beta$ -actin was used as a loading control.

(A)

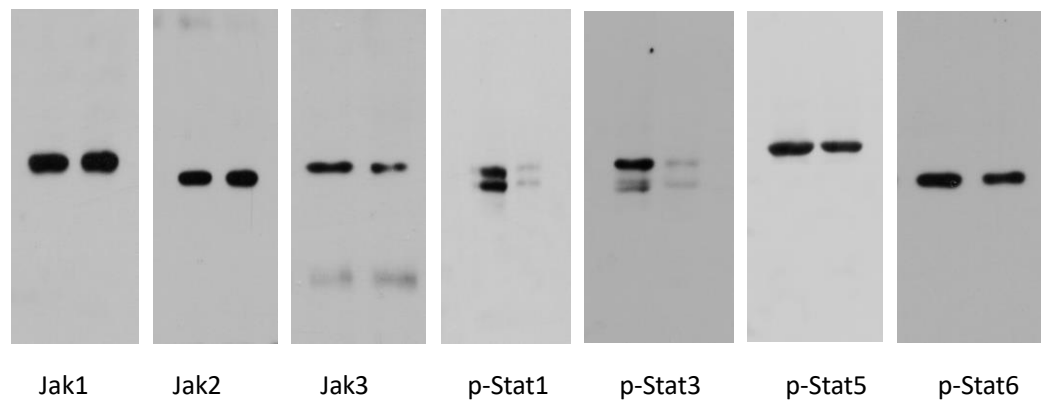

(B)

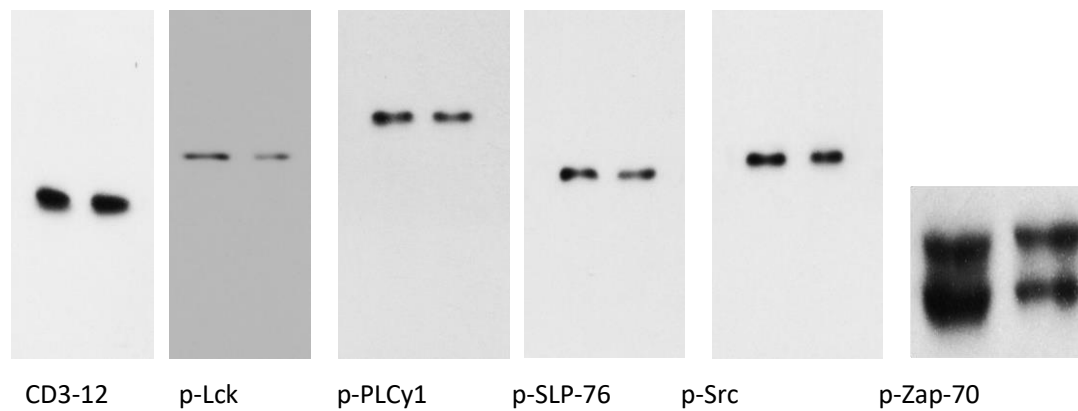

(C)

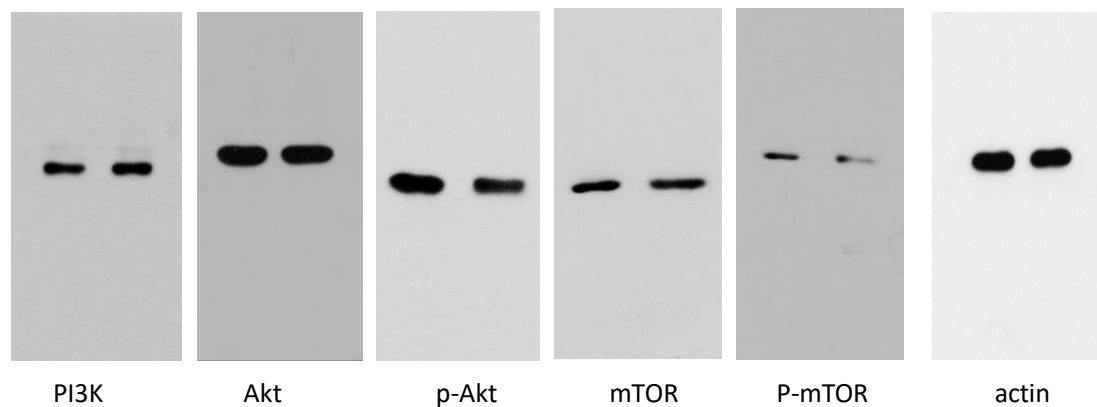

Supplement: 41598_2018_30881_MOESM1_ESM.pdf [file 41598_2018_30881_MOESM1_ESM.pdf]
